# Supplementary material for: Association of changes in commute mode with body mass index and visceral adiposity: a longitudinal study
Source: PubMed Central journal article supplement (PMC6836489; doi:10.1186/s12966-019-0870-x), 2019-11-06
Supplement: 12966_2019_870_MOESM1_ESM.pdf [file 12966_2019_870_MOESM1_ESM.pdf]

**Supplementary data**

**Association of changes in commute mode with body mass index and visceral adiposity**

Kuwahara K,<sup>1,2,\*</sup> Noma H,<sup>3</sup> Nakagawa T,<sup>4</sup> Honda T,<sup>4</sup> Yamamoto S,<sup>4</sup> Hayashi T,<sup>4</sup> Mizoue T.<sup>1</sup>

| <b><u>Table of contents:</u></b>   | <b>Page no.</b> |
|------------------------------------|-----------------|
| <b>Supplementary Table 1.....</b>  | <b>S2</b>       |
| <b>Supplementary Table 2.....</b>  | <b>S3</b>       |
| <b>Supplementary Table 3.....</b>  | <b>S4</b>       |
| <b>Supplementary Table 4.....</b>  | <b>S5-S6</b>    |
| <b>Supplementary Table 5.....</b>  | <b>S7-S8</b>    |
| <b>Supplementary Table 6.....</b>  | <b>S9</b>       |
| <b>Supplementary Table 7.....</b>  | <b>S10</b>      |
| <b>Supplementary Table 8.....</b>  | <b>S11</b>      |
| <b>Supplementary Figure 1.....</b> | <b>S12</b>      |

**Supplementary Table 1.** Characteristics of participants included and excluded from the main analysis

| Baseline variables                  | Included (n=29,758) | Exclude (n=8093) |
|-------------------------------------|---------------------|------------------|
| Age, year                           | 43.2 (8.2)          | 42.2 (8.7)       |
| Female                              | 13.3                | 22.5             |
| Commuting mode                      |                     |                  |
| Walking                             | 12.4                | 11.1             |
| Cycling                             | 9.8                 | 9.3              |
| Public transport                    | 20.5                | 19.7             |
| Car/motorbike                       | 57.3                | 59.9             |
| <20 min of walking to and from work | 53.5                | 72.6             |
| Shift work                          | 17.3                | 19.9             |
| ≥45 hours of overtime work          | 36.5                | 28.6             |
| Sedentary work                      | 62.3                | 46.9             |
| High job position                   | 18.9                | 11.7             |
| Current smoking                     | 42.9                | 38.2             |
| Heavy alcohol use*                  | 9.1                 | 5.0              |
| No exercise                         | 65.8                | 70.4             |
| Short sleep duration (<5 hrs/day)   | 7.3                 | 8.5              |
| BMI, kg/m <sup>2</sup>              | 23.5 (3.4)          | 23.3 (3.5)       |
| SBP, mmHg                           | 122 (14)            | 121 (15)         |
| DBP, mmHg                           | 76 (10)             | 75 (11)          |
| Treatment of hypertension           | 6.8                 | 5.0              |
| Fasting triglycerides, mg/dL        | 128 (92)            | 119 (94)         |
| HDL-cholesterol, mg/dL              | 56 (14)             | 58 (15)          |
| LDL-cholesterol, mg/dL              | 119 (30)            | 118 (31)         |
| Treatment of dyslipidemia           | 4.3                 | 2.7              |
| Fasting plasma glucose, mg/dL       | 101 (19)            | 98 (19)          |
| HbA1c, %                            | 5.7 (0.7)           | 5.7 (0.8)        |
| Treatment of diabetes               | 2.8                 | 2.2              |

Data are shown as % or mean (SD). BMI, body mass index; DBP, diastolic blood pressure; HDL, high-density lipoprotein; LDL, low-density lipoprotein; SBP, systolic blood pressure.

\* Heavy alcohol use was defined as consumption of ≥2 go of Japanese sake equivalent per day, which approximates to 46 g or more of ethanol consumption per day.

**Supplementary Table 2.** Association of changes in commuting mode with baseline exercise and transitions in leisure-time exercise or occupational physical activity

|                                                      | Maintained<br>commute<br>(n=14,704) | inactive<br>(n=2485) | Switched from active<br>or public transportation<br>to inactive commute<br>(n=2359) | Switched from inactive<br>to active or public<br>transportation<br>commute<br>(n=10,210) | Maintained active or<br>public transportation<br>(n=10,210) |
|------------------------------------------------------|-------------------------------------|----------------------|-------------------------------------------------------------------------------------|------------------------------------------------------------------------------------------|-------------------------------------------------------------|
| <b>Baseline leisure-time exercise</b>                |                                     |                      |                                                                                     |                                                                                          |                                                             |
| Some walking, n (%)                                  | 1626 (11.1)                         | 229 (9.2)            | 263 (11.2)                                                                          | 1091 (10.7)                                                                              |                                                             |
| Some cycling (10 km/ occasion), n (%)                | 211 (1.4)                           | 60 (2.4)             | 40 (1.7)                                                                            | 268 (2.6)                                                                                |                                                             |
| <b>Transitions in leisure-time exercise</b>          |                                     |                      |                                                                                     |                                                                                          |                                                             |
| Maintained no exercise                               | 7855 (53.4)                         | 1330 (53.5)          | 1241 (52.6)                                                                         | 5661 (55.5)                                                                              |                                                             |
| Quit exercise                                        | 1803 (12.3)                         | 305 (12.3)           | 295 (12.5)                                                                          | 1155 (11.3)                                                                              |                                                             |
| Started exercise                                     | 1712 (11.6)                         | 333 (13.4)           | 272 (11.5)                                                                          | 1177 (11.5)                                                                              |                                                             |
| Maintained exercise                                  | 3334 (22.7)                         | 517 (20.8)           | 551 (23.4)                                                                          | 2217 (21.7)                                                                              |                                                             |
| <b>Transitions in occupational physical activity</b> |                                     |                      |                                                                                     |                                                                                          |                                                             |
| Maintained sedentary                                 | 6989 (47.5)                         | 1481 (59.6)          | 1472 (62.4)                                                                         | 7043 (69.0)                                                                              |                                                             |
| Changed to sedentary                                 | 1035 (7.0)                          | 160 (6.4)            | 175 (7.4)                                                                           | 567 (5.6)                                                                                |                                                             |
| Changed to active                                    | 821 (5.6)                           | 179 (7.2)            | 116 (4.9)                                                                           | 443 (4.3)                                                                                |                                                             |
| Maintained active                                    | 5859 (39.9)                         | 665 (26.8)           | 596 (25.3)                                                                          | 2157 (21.1)                                                                              |                                                             |

Data are shown as n (%).

**Supplementary Table 3.** A sensitivity analysis on the changes in commuting mode and BMI with multiple imputation using chained equations (n=37,847)

|                                              | Multivariable model 2 | P values  |
|----------------------------------------------|-----------------------|-----------|
| Maintained inactive                          | 0.17 (0.15, 0.19)     | Reference |
| Switching to inactive                        | 0.24 (0.19, 0.29)     | 0.018     |
| Switching to active or public transportation | 0.07 (0.01, 0.13)     | <0.001    |
| Maintained active or public transportation   | 0.04 (0.01, 0.06)     | <0.001    |

Data are shown as adjusted mean with 95% confidence intervals in body mass index (kg/m<sup>2</sup>) over 5 years.

**Supplementary Table 4. A sensitivity analysis for BMI with consideration of transitions in commuting mode during 1 to 4 years after baseline (n = 24,686)**

| Commuting mode                                                  | N             | Non-adjusted       | Multivariable-adjusted 1* | Multivariable-adjusted 2† |
|-----------------------------------------------------------------|---------------|--------------------|---------------------------|---------------------------|
| <b>Persistently inactive</b>                                    |               |                    |                           |                           |
| Inactive during 1 to 4 yrs after baseline                       | 10,306 (83.7) | 0.16 (0.13, 0.19)  | 0.18 (0.15, 0.20)         | 0.18 (0.16, 0.21)         |
| Intermittent during 1 to 4 yrs after baseline                   | 1,968 (16.0)  | 0.20 (0.13, 0.26)  | 0.17 (0.15, 0.19)         | 0.17 (0.15, 0.19)         |
| Active or public transport use during 1 to 4 yrs after baseline | 34 (0.3)      | 0.06 (-0.45, 0.57) | 0.01 (-0.01, 0.03)        | 0.03 (0.00, 0.05)         |
| <b>Became inactive</b>                                          |               |                    |                           |                           |
| Inactive during 1 to 4 yrs after baseline                       | 656 (33.1)    | 0.29 (0.18, 0.40)  | 0.23 (0.20, 0.26)         | 0.22 (0.19, 0.25)         |
| Intermittent during 1 to 4 yrs after baseline                   | 1,037 (52.3)  | 0.29 (0.20, 0.39)  | 0.25 (0.22, 0.28)         | 0.22 (0.19, 0.25)         |
| Active or public transport use during 1 to 4 yrs after baseline | 289 (14.6)    | 0.21 (0.02, 0.40)  | 0.21 (0.19, 0.24)         | 0.18 (0.15, 0.21)         |
| <b>Became active</b>                                            |               |                    |                           |                           |
| Inactive during 1 to 4 yrs after baseline                       | 545 (29.1)    | 0.07 (-0.05, 0.19) | 0.11 (0.10, 0.13)         | 0.11 (0.09, 0.13)         |
| Intermittent during 1 to 4 yrs after baseline                   | 1,038 (55.3)  | 0.06 (-0.03, 0.15) | 0.07 (0.05, 0.09)         | 0.08 (0.05, 0.09)         |
| Active or public transport use during 1 to 4 yrs after baseline | 293 (15.6)    | 0.16 (-0.01, 0.32) | 0.11 (0.10, 0.13)         | 0.09 (0.07, 0.11)         |
| <b>Persistently active</b>                                      |               |                    |                           |                           |
| Inactive during 1 to 4 yrs after baseline                       | 89 (1.0)      | 0.05 (-0.26, 0.37) | 0.02 (0.00, 0.05)         | 0.05 (0.02, 0.08)         |
| Intermittent during 1 to 4 yrs after baseline                   | 625 (7.3)     | 0.13 (0.01, 0.24)  | 0.03 (0.01, 0.05)         | 0.03 (0.01, 0.05)         |
| Active or public transport use during 1 to 4 yrs after baseline | 7,806 (91.6)  | 0.06 (-0.04, 0.03) | 0.00 (-0.03, 0.03)        | -0.01 (-0.04, 0.02)       |

Data are shown as changes in BMI over 5 years with 95% confidence intervals.

\*Adjusted for baseline variables of age, sex, and body mass index.

†Further adjusted for smoking transition, baseline alcohol consumption, 5-year changes in alcohol consumption, baseline sleep duration, changes in the sleep duration, baseline weekly exercise duration during leisure, 5-year changes in the exercise duration, occupational physical activity transition, job position transition, shift work transition, and overtime work transition.

**Supplementary Table 5.** Associations of active commuting, public transport use, and inactive commuting with BMI.

|                                                   | Crude model            | P values | Multivariable model 1*  | P values | Multivariable model 2†  | P values |
|---------------------------------------------------|------------------------|----------|-------------------------|----------|-------------------------|----------|
| Maintained inactive<br>(n = 14,704)               | 0.18<br>(0.16, 0.20)   | Ref      | 0.18<br>(0.16, 0.20)    | Ref      | 0.19<br>(0.17, 0.21)    | Ref      |
| Switching from transport to inactive<br>(n = 896) | 0.29<br>(0.20, 0.39)   | 0.023    | 0.24<br>(0.21, 0.27)    | 0.007    | 0.21<br>(0.18, 0.24)    | <0.001   |
| Switching from active to inactive<br>(n = 1589)   | 0.26<br>(0.18, 0.33)   | 0.049    | 0.24<br>(0.21, 0.26)    | 0.12     | 0.22<br>(0.20, 0.25)    | 0.026    |
| Maintained transport<br>(n = 4580)                | 0.01<br>(-0.03, 0.05)  | <0.001   | 0.02<br>(0.00, 0.04)    | <0.001   | 0.02<br>(0.00, 0.04)    | <0.001   |
| Switching from inactive to transport<br>(n = 910) | 0.07<br>(-0.02, 0.17)  | 0.029    | 0.11<br>(0.09, 0.13)    | 0.11     | 0.10<br>(0.08, 0.12)    | 0.13     |
| Switching from active to transport<br>(n = 932)   | 0.07<br>(-0.03, 0.16)  | 0.02     | 0.12<br>(0.10, 0.13)    | 0.008    | 0.10<br>(0.08, 0.12)    | 0.099    |
| Maintained active<br>(n = 4065)                   | 0.04<br>(-0.01, 0.08)  | <0.001   | 0.03<br>(0.01, 0.06)    | <0.001   | 0.03<br>(0.01, 0.06)    | <0.001   |
| Switching from inactive to active<br>(n = 1449)   | 0.07<br>(0.00, 0.15)   | 0.006    | 0.01<br>(-0.02, 0.05)   | 0.001    | 0.02<br>(-0.01, 0.06)   | 0.001    |
| Switching from transport to active<br>(n = 633)   | -0.09<br>(-0.21, 0.02) | <0.001   | -0.09<br>(-0.13, -0.05) | <0.001   | -0.09<br>(-0.13, -0.05) | 0.002    |

Data are shown as estimated mean with 95% confidence intervals. Ref, Reference.

\*Model 1: Baseline variables of age, sex, and body mass index were adjusted.

†Model 2: Further adjusted for smoking transition, baseline alcohol consumption, 5-year changes in alcohol consumption, baseline sleep duration,

changes in the sleep duration, baseline weekly exercise duration during leisure, 5-year changes in the exercise duration, occupational physical activity transition, job position transition, shift work transition, and overtime work transition.



**Supplementary Table 6.** Associations of active commuting, public transport use, and inactive commuting with BMI by leisure-time exercise transition

| Commuting mode transition            | Leisure-time exercise transition |                    |                      |                      |
|--------------------------------------|----------------------------------|--------------------|----------------------|----------------------|
|                                      | Maintained no exercise           | Quit exercise      | Started exercise     | Maintained exercise  |
| Maintained inactive                  | 0.27 (0.24, 0.30)                | 0.35 (0.29, 0.40)  | -0.12 (-0.19, -0.06) | 0.06 (0.02, 0.09)    |
|                                      | Reference                        | Reference          | Reference            | Reference            |
| Switching from transport to inactive | 0.32 (0.27, 0.36)                | 0.42 (0.33, 0.52)  | -0.17 (-0.28, -0.06) | 0.07 (0.00, 0.13)    |
|                                      | P=0.001                          | P=0.85             | P=0.20               | P=0.15               |
| Switching from active to inactive    | 0.32 (0.28, 0.35)                | 0.39 (0.31, 0.46)  | -0.09 (-0.18, -0.01) | 0.10 (0.05, 0.14)    |
|                                      | P=0.013                          | P=0.29             | P=0.16               | P=0.16               |
| Maintained transport                 | 0.10 (0.07, 0.13)                | 0.16 (0.10, 0.23)  | -0.36 (-0.43, -0.29) | -0.06 (-0.10, -0.02) |
|                                      | P=0.004                          | P=0.14             | P=0.65               | P=0.004              |
| Switching from inactive to transport | 0.19 (0.17, 0.22)                | 0.22 (0.17, 0.28)  | -0.26 (-0.32, -0.20) | 0.01 (-0.03, 0.04)   |
|                                      | P=0.39                           | P=0.06             | P=0.59               | P=0.12               |
| Switching from active to transport   | 0.19 (0.16, 0.21)                | 0.26 (0.20, 0.32)  | -0.34 (-0.41, -0.27) | 0.00 (-0.03, 0.04)   |
|                                      | P=0.16                           | P=0.95             | P=0.31               | P=0.31               |
| Maintained active                    | 0.12 (0.08, 0.15)                | 0.21 (0.12, 0.29)  | -0.37 (-0.46, -0.28) | -0.04 (-0.09, 0.01)  |
|                                      | P<0.001                          | P=0.095            | P=0.002              | P=0.002              |
| Switching from inactive to active    | 0.12 (0.07, 0.16)                | 0.17 (0.07, 0.27)  | -0.38 (-0.50, -0.27) | -0.06 (-0.13, 0.00)  |
|                                      | P=0.051                          | P=0.011            | P=0.13               | P=0.61               |
| Switching from transport to active   | 0.00 (-0.05, 0.06)               | 0.10 (-0.02, 0.22) | -0.52 (-0.66, -0.39) | -0.17 (-0.25, -0.09) |
|                                      | P=0.083                          | P=0.79             | P=0.13               | P=0.13               |

Data are adjusted for factors in model 2.

**Supplementary Table 7.** Associations of active commuting, public transport use, and inactive commuting with BMI by occupational physical activity transition

|                                      | Occupational physical activity transition |                                  |                                 |                                |
|--------------------------------------|-------------------------------------------|----------------------------------|---------------------------------|--------------------------------|
|                                      | Maintained sedentary<br>(n=16,985)        | Changed to sedentary<br>(n=1937) | Changed to active<br>(n=1559)   | Maintained active<br>(n=9277)  |
| Maintained inactive                  | 0.14 (0.11, 0.17)<br>Reference            | 0.43 (0.35, 0.52)<br>Reference   | 0.00 (-0.09, 0.09)<br>Reference | 0.23 (0.20, 0.27)<br>Reference |
| Switching from transport to inactive | 0.20 (0.16, 0.24)<br>P=0.018              | 0.36 (0.28, 0.44)<br>P=0.14      | -0.08 (-0.17, 0.00)<br>P=0.62   | 0.20 (0.17, 0.23)<br>P=0.012   |
| Switching from active to inactive    | 0.18 (0.14, 0.21)<br>P=0.014              | 0.45 (0.38, 0.52)<br>P=0.30      | 0.02 (-0.06, -0.10)<br>P=0.38   | 0.21 (0.19, 0.24)<br>P=0.073   |
| Maintained transport                 | -0.01 (-0.04, 0.01)<br>P<0.001            | 0.34 (0.25, 0.44)<br>P=0.77      | -0.14 (-0.25, -0.03)<br>P=0.36  | 0.09 (0.04, 0.13)<br>P=0.23    |
| Switching from inactive to transport | 0.06 (0.04, 0.08)<br>P=0.30               | 0.40 (0.32, 0.47)<br>P=0.17      | 0.07 (-0.02, 0.15)<br>P=0.37    | 0.17 (0.13, 0.20)<br>P=0.27    |
| Switching from active to transport   | 0.08 (0.06, 0.10)<br>P=0.16               | 0.38 (0.29, 0.47)<br>P=0.11      | -0.01 (-0.10, 0.09)<br>P=0.53   | 0.12 (0.08, 0.15)<br>P=0.94    |
| Maintained active                    | -0.03 (-0.06, 0.02)<br>P<0.001            | 0.40 (0.29, 0.51)<br>P=0.55      | -0.03 (-0.16, 0.09)<br>P=0.63   | 0.12 (0.07, 0.17)<br>P=0.13    |
| Switching from inactive to active    | -0.05 (-0.09, 0.00)<br>P=0.003            | 0.40 (0.27, 0.53)<br>P=0.72      | 0.00 (-0.15, 0.15)<br>P=0.85    | 0.12 (0.05, 0.18)<br>P=0.073   |
| Switching from transport to active   | -0.14 (-0.19, -0.09)<br>P=0.003           | 0.24 (0.09, 0.40)<br>P=0.32      | -0.15 (-0.32, 0.03)<br>P=0.16   | 0.03 (-0.04, 0.10)<br>P=0.08   |

Data were adjusted for factors in model 2.

**Supplementary Table 8.** Changes in BMI over 5 years according to the transitions in time spent in walking to and from work among workers who persistently used public transport as main commuting mode

| Time spent in walking to and from work | Crude model        | Multivariable model 1* | Multivariable model 2† |
|----------------------------------------|--------------------|------------------------|------------------------|
| Persistently short‡ (n=204)            | 0.08 (-0.13, 0.28) | 0.05 (0.02, 0.07)      | 0.05 (0.03, 0.08)      |
| Intermediate (n=3215)                  | 0.01 (-0.04, 0.06) | 0.02 (0.00, 0.04)      | 0.02 (0.00, 0.04)      |
| Persistently long‡(n=1161)             | 0.01 (-0.07, 0.09) | 0.02 (0.00, 0.04)      | 0.01 (-0.01, 0.04)     |

Data are shown as estimated mean with 95% confidence intervals.

\*Model 1: Baseline variables of age, sex, and body mass index were adjusted.

†Model 2: Further adjusted for smoking transition, baseline alcohol consumption, 5-year changes in alcohol consumption, baseline sleep duration, changes in the sleep duration, baseline weekly exercise duration during leisure, 5-year changes in the exercise duration, occupational physical activity transition, job position transition, shift work transition, and overtime work transition.

‡ Persistently short is defined as <20 min of walking to and from work both at baseline and 5 year follow-up examination, whereas persistently long was defined as 40 min or more of walking to and from work both at baseline and 5 year follow-up examination.

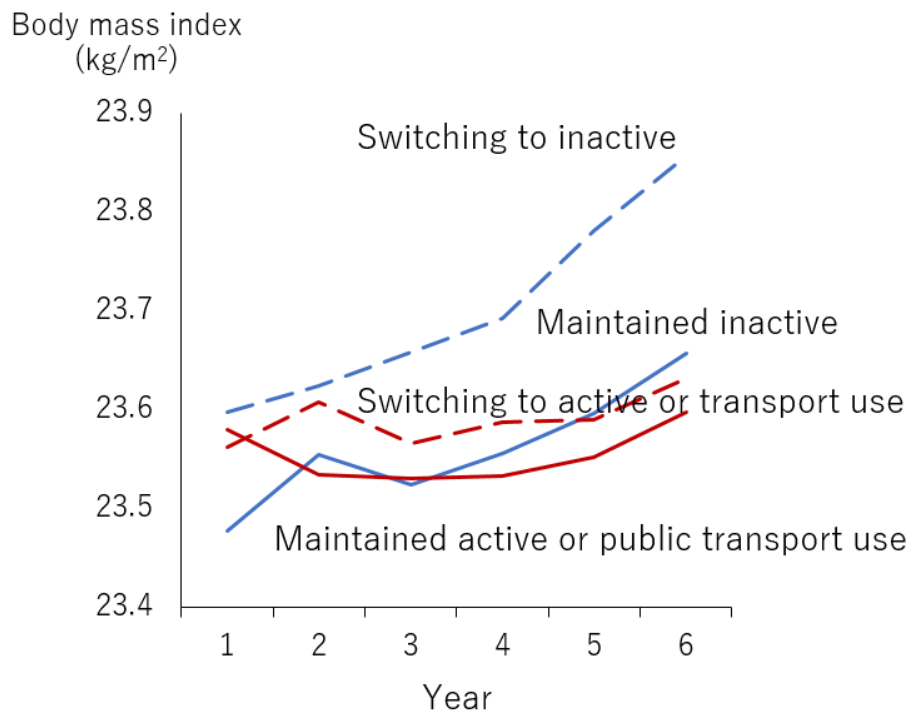

**Supplementary Figure 1.** Trajectories of non-adjusted average body mass index according to the changes in commuting mode.

Dashed line in blue indicates “Switching to inactive group”, straight line in blue indicates “Maintained inactive group”, dashed line in red indicates “Switching to active or transport use group”, and straight line in red indicates “Maintained active or public transport use group”. BMI trajectories from baseline (Year 1) to 5-year follow-up (Year 6) were calculated among 29 758 participants; 393 were excluded due to no data on BMI during 1 year to 4 years after the baseline examination (Year 2 to 5).
